# Supplementary material for: Tuning chromaticity based on energy transfer from the conjugated polymer to the Eu(TTA)3 moiety
Source: Royal Society of Chemistry journal article supplement (doi:10.1039/c2py20347b), 2012-01-01
Supplement: c2py20347b.pdf [file c2py20347b.pdf]

## Supporting Information

### Tuning Chromaticity Based on Energy Transfer from the Conjugated Polymer to Eu(TTA)<sub>3</sub> Moiety

Junfeng Li, Lu Wang, Xunhua Liu, Xiaoxiang Jiang, Yixiang Cheng\*, Chengjian Zhu\*

Key Lab of Mesoscopic Chemistry of MOE, School of Chemistry and Chemical Engineering,

Nanjing University, Nanjing 210093, China

E-mail: yxcheng@nju.edu.cn and cjzhu@nju.edu.cn

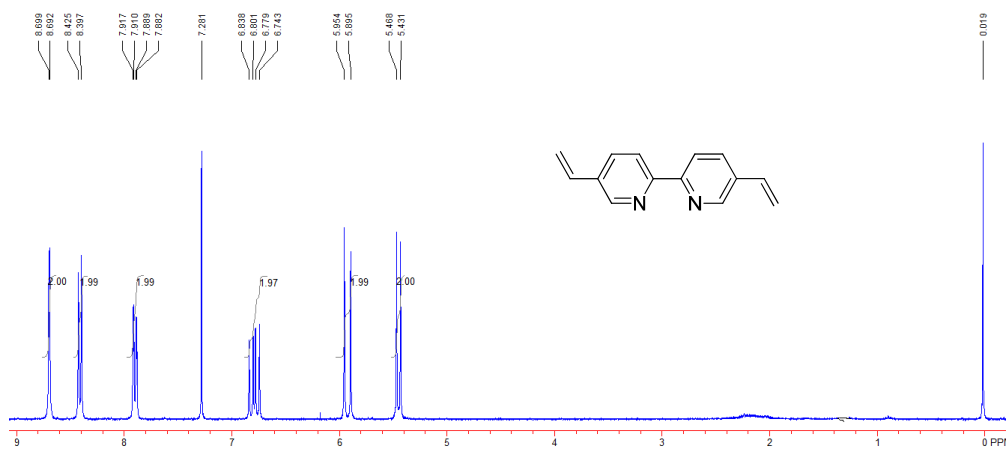

Fig S1. <sup>1</sup>H NMR spectrum of M-1 in CDCl<sub>3</sub>

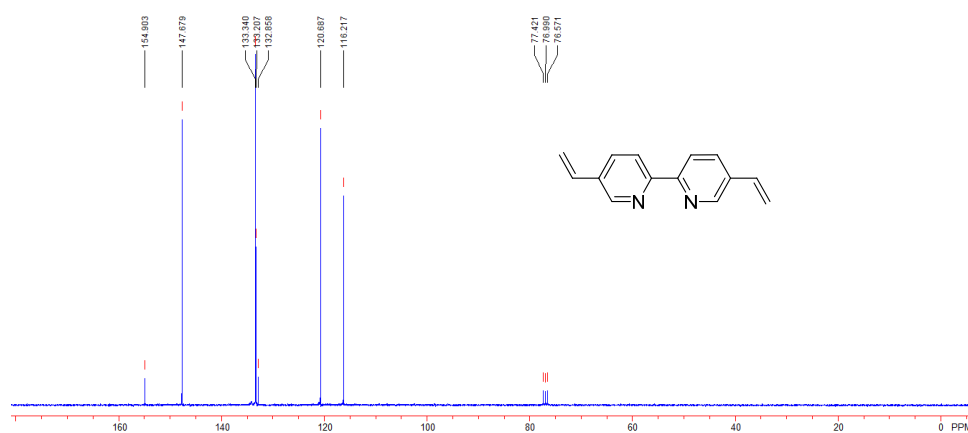

Fig S2. <sup>13</sup>C NMR spectrum of M-1 in CDCl<sub>3</sub>

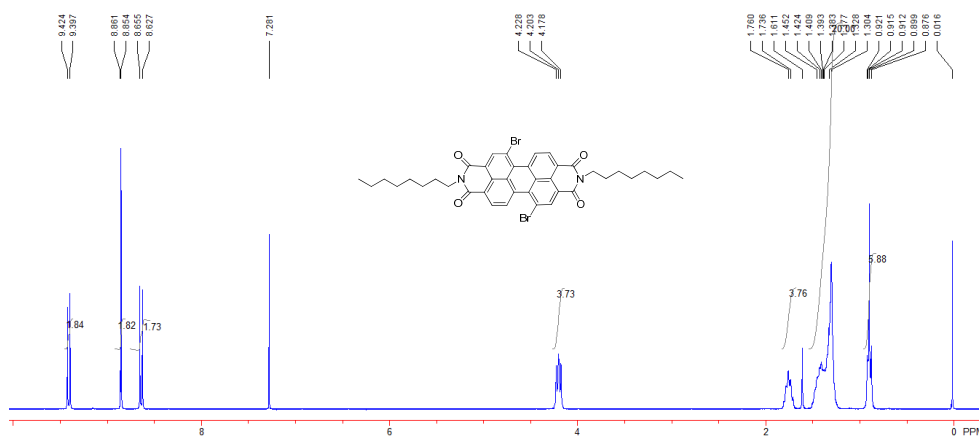

Fig S3. <sup>1</sup>H NMR spectrum of M-2 in CDCl<sub>3</sub>

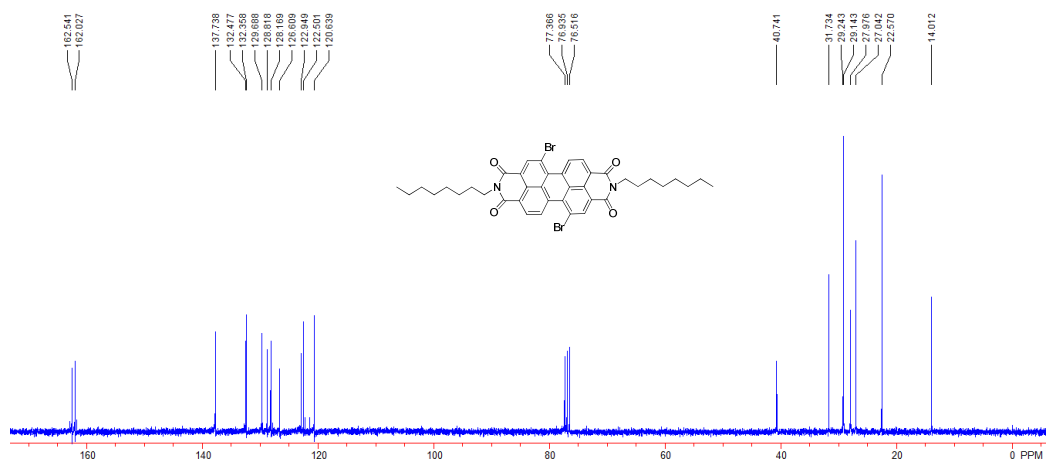

Fig S4. <sup>13</sup>C NMR spectrum of M-2 in CDCl<sub>3</sub>

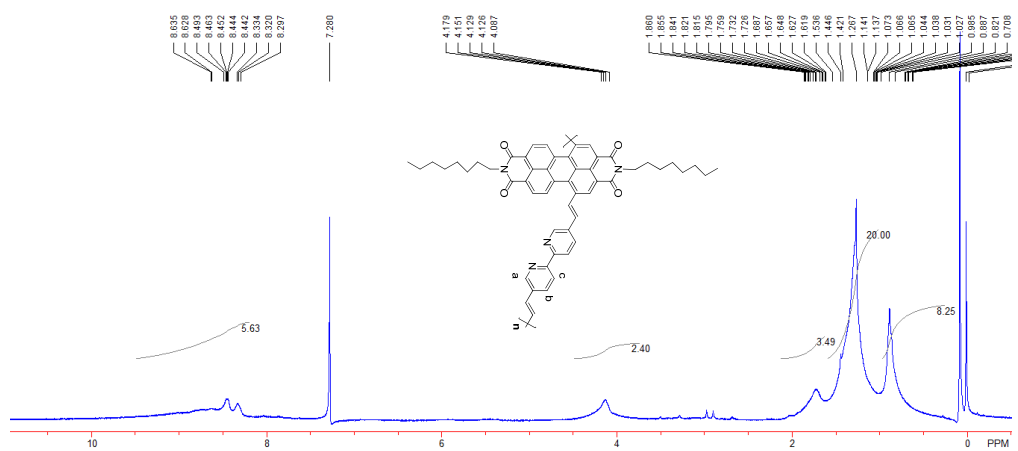

Fig S5. <sup>1</sup>H NMR spectrum of P-1 in CDCl<sub>3</sub>

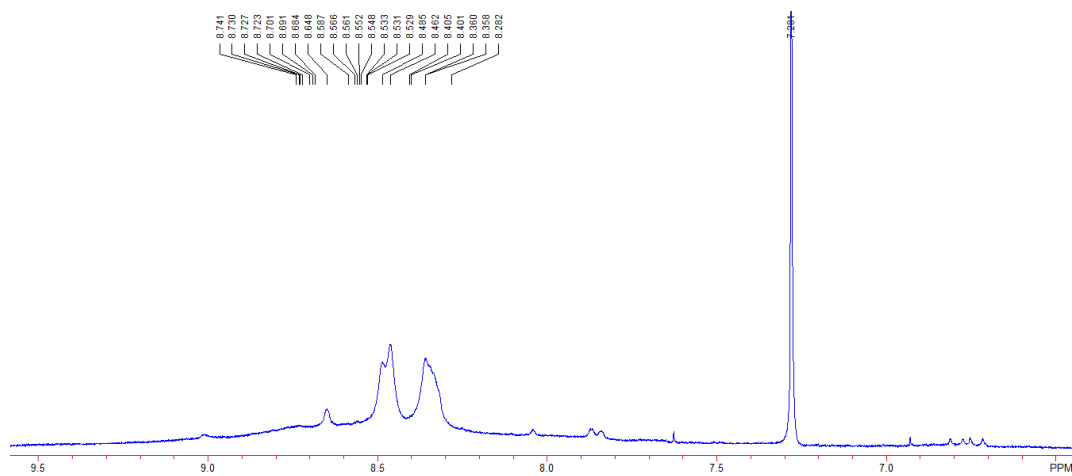

Fig S6. <sup>1</sup>H NMR spectrum moiety of P-1 in CDCl<sub>3</sub>.

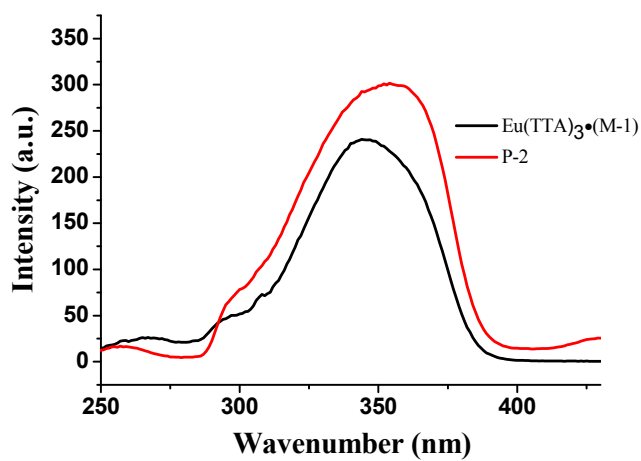

**Fig S7.** Excitation properties of Eu(TTA)<sub>3</sub>·(M-1) and P-2 complexes ( $1.0 \times 10^{-5} \text{ mol L}^{-1}$ ) were recorded in THF at room temperature ( $\lambda_{\text{em}} = 613 \text{ nm}$ ).

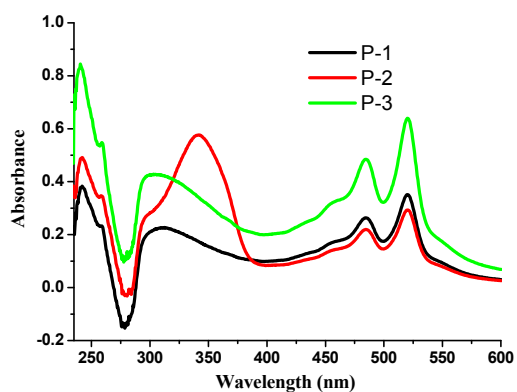

**Fig S8.** UV-vis spectra of the P-1, P-2 and P-3 in THF ( $1 \times 10^{-5} \text{ mol L}^{-1}$ )
